# Supplementary material
Source: PubMed Central journal article supplement (PMC8930949)
Supplement: 40261_2022_1127_MOESM1_ESM.pdf [file 40261_2022_1127_MOESM1_ESM.pdf]

## Clinical Drug Investigation

### The impact of Covid-19 vaccination on the Italian healthcare system: a scenario analysis

**Running header:** Covid-19 vaccination on the Italian healthcare system

Marcellusi Andrea<sup>1,2</sup>, Fabiano Gianluca<sup>2,3</sup>, Sciattella Paolo<sup>1</sup>, Andreoni Massimo<sup>4</sup>, Mennini Francesco  
S<sup>1,2</sup>

<sup>1</sup> Economic Evaluation and HTA |Centre for Economic and International Studies|(EEHTA-CEIS), Faculty of Economics, University of Tor Vergata, Rome, Italy

<sup>2</sup> Institute for Leadership and Management in Health, Kingston University London, London, UK

<sup>3</sup> Nuffield Department of Orthopaedics, Rheumatology and Musculoskeletal Sciences, University of Oxford, Oxford, UK

<sup>4</sup> Infectious Diseases Clinic, Policlinic of Tor Vergata, Rome, Italy

## Supplementary material

Figure 1 - Age distribution of Covid-19-related event – Italy 1st January 2020-31st December 2021

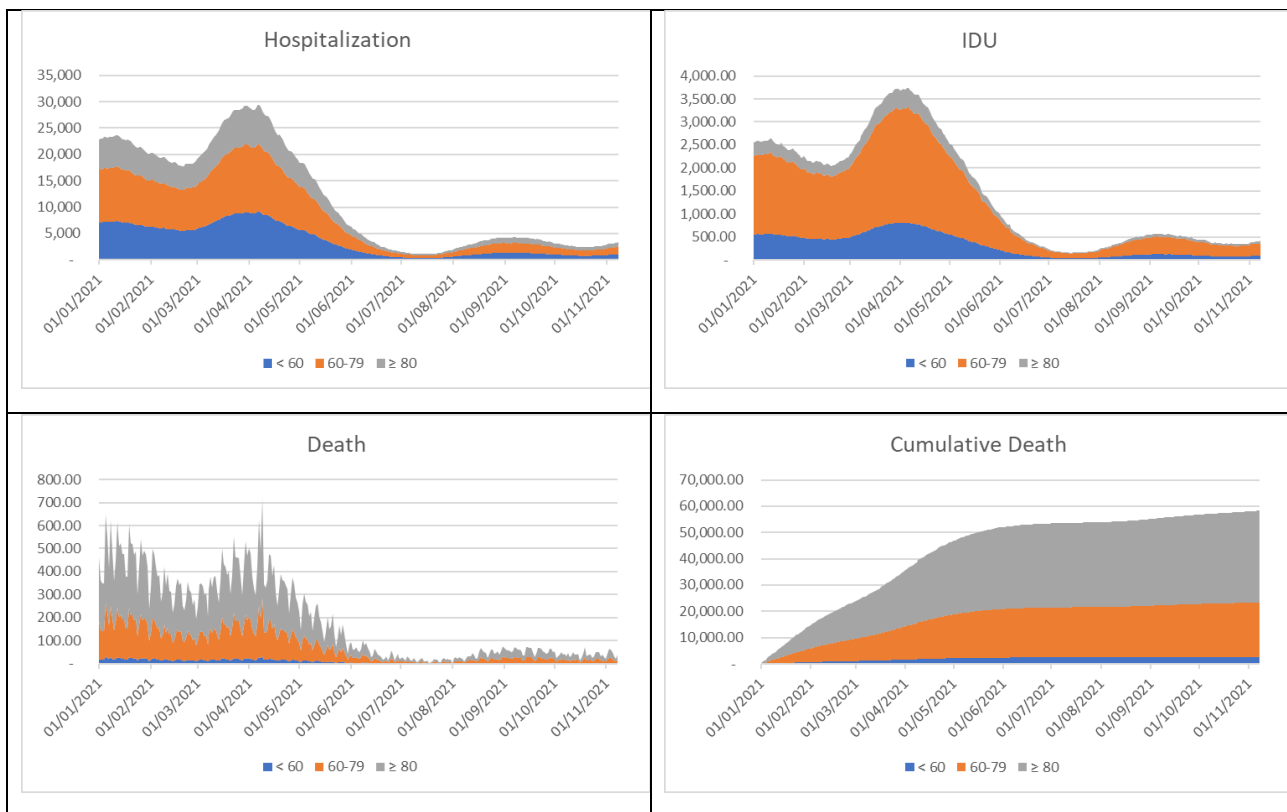

Data from Italian National Institute of Statistics (ISTAT) and the Italian National Institute of Health (ISS) websites (<https://www.epicentro.iss.it/coronavirus/sars-cov-2-sorveglianza-dati>).

Age distribution for hospitalisations and IDU admissions were estimated considering a sample of 996 Covid-19 hospitalisations recorded in Policlinico Tor Vergata Hospital between 2<sup>nd</sup> March 2020 and 27<sup>th</sup> December 2020 (Table 1).

Table 1 - Distribution of Covid-19-related events by age class in Italy

| Age Class (Years) | Hospitalisations <sup>1</sup> |             | ICU Admissions |             | Deaths <sup>2</sup> |             |
|-------------------|-------------------------------|-------------|----------------|-------------|---------------------|-------------|
|                   | N                             | %           | N              | %           | N                   | %           |
| < 60              | 308                           | 31%         | 49             | 22%         | 1,907               | 11%         |
| 60-79             | 437                           | 44%         | 152            | 67%         | 14,834              | 51%         |
| 80 +              | 251                           | 25%         | 26             | 11%         | 24,989              | 38%         |
| <b>Total</b>      | <b>996</b>                    | <b>100%</b> | <b>227</b>     | <b>100%</b> | <b>41,730</b>       | <b>100%</b> |

<sup>1</sup> Derived from Policlinico Tor Vergata Hospital

<sup>2</sup> Derived from recorded death by age – Italian Ministry of Health monitoring Data updated 11/11/2020

Table 2 - Average cost per hospitalized patients - estimated considering a sample of 996 Covid-19 hospitalisations recorded in Policlinico Tor Vergata Hospital between 2nd March 2020 and 27th December 2020

| Departement                 | Age (Years) | Death | N   | Average days in hospital | Average cost | Average Daily cost |
|-----------------------------|-------------|-------|-----|--------------------------|--------------|--------------------|
| Hospitalisation without ICU | <60         | No    | 253 | 11.9                     | 4,604 €      | 552 €              |
|                             |             | Yes   | 6   | 24.7                     | 7,411 €      | 320 €              |
|                             |             | Total | 259 | 12.2                     | 4,669 €      | 547 €              |
|                             | 60-79       | No    | 237 | 16.8                     | 5,517 €      | 480 €              |
|                             |             | Yes   | 37  | 18.7                     | 8,412 €      | 697 €              |
|                             |             | Total | 274 | 17.0                     | 5,908 €      | 508 €              |
|                             | 80+         | No    | 127 | 21.0                     | 5,655 €      | 407 €              |
|                             |             | Yes   | 109 | 14.2                     | 5,037 €      | 699 €              |
|                             |             | Total | 236 | 17.9                     | 5,370 €      | 540 €              |
|                             | Total       | No    | 617 | 15.6                     | 5,171 €      | 494 €              |
|                             |             | Yes   | 152 | 15.7                     | 5,952 €      | 683 €              |
|                             |             | Total | 769 | 15.6                     | 5,326 €      | 531 €              |
| Hospitalisation with ICU    | <60         | No    | 17  | 33.0                     | 10,577 €     | 420 €              |
|                             |             | Yes   | 17  | 17.1                     | 22,100 €     | 1,663 €            |
|                             |             | Total | 34  | 25.1                     | 16,338 €     | 1,042 €            |
|                             | 60-79       | No    | 20  | 39.4                     | 10,633 €     | 480 €              |
|                             |             | Yes   | 76  | 15.4                     | 14,193 €     | 1,171 €            |
|                             |             | Total | 96  | 20.4                     | 13,451 €     | 1,027 €            |
|                             | 80+         | No    | 3   | 26.0                     | 7,046 €      | 288 €              |
|                             |             | Yes   | 13  | 19.2                     | 10,967 €     | 973 €              |
|                             |             | Total | 16  | 20.5                     | 10,232 €     | 845 €              |
|                             | Total       | No    | 40  | 35.7                     | 10,340 €     | 440 €              |
|                             |             | Yes   | 106 | 16.1                     | 15,065 €     | 1,226 €            |
|                             |             | Total | 146 | 21.5                     | 13,771 €     | 1,010 €            |
| Only ICU                    | <60         | No    | 1   | 0.0                      | 661 €        | .                  |
|                             |             | Yes   | 14  | 9.9                      | 17,916 €     | 1,853 €            |
|                             |             | Total | 15  | 9.2                      | 16,766 €     | 1,853 €            |
|                             | 60-79       | No    | 0   |                          |              |                    |
|                             |             | Yes   | 49  | 9.4                      | 17,646 €     | 2,294 €            |
|                             |             | Total | 49  | 9.4                      | 17,646 €     | 2,294 €            |
|                             | 80+         | No    | 0   |                          |              |                    |
|                             |             | Yes   | 17  | 8.3                      | 13,875 €     | 1,788 €            |
|                             |             | Total | 17  | 8.3                      | 13,875 €     | 1,788 €            |
|                             | Total       | No    | 1   | 0.0                      | 661 €        | .                  |
|                             |             | Yes   | 80  | 9.3                      | 16,892 €     | 2,109 €            |
|                             |             | Total | 81  | 9.1                      | 16,691 €     | 2,109 €            |
